# Supplementary material for: Facile and efficient exfoliation of inorganic layered materials using liquid alkali metal alloys
Source: Royal Society of Chemistry journal article supplement (doi:10.1039/c5cc02625c), 2015-01-01
Supplement: c5cc02625c1.pdf [file c5cc02625c1.pdf]

## Electronic Supplementary Information

# Facile and efficient exfoliation of inorganic layered materials using liquid alkali metals alloy

*Hongbin Feng, Zhongbo Hu, and Xiangfeng Liu\**

College of Materials Science and Opto-electronic Technology, University of Chinese

Academy of Sciences, Beijing 100049, China

S1. Experimental Section

S2. Dispersion of BN and UV-vis spectra of MoS<sub>2</sub>, WS<sub>2</sub> and BN

S3. TEM and EDS of MoS<sub>2</sub> nanosheets

S4. XRD of MoS<sub>2</sub> before and after exfoliation

S5. MoS<sub>2</sub> and WS<sub>2</sub> film fabrication, and EDS and Raman Characterization

S6. Comparison between our method and the previous liquid-phase exfoliation methods

## S1. Experimental Section

### Intercalation and exfoliation of the MoS<sub>2</sub>, WS<sub>2</sub> and BN:

Na (1 g, Aladdin) and K (1 g, Aladdin) and 200 ml 1,2-dimethoxyethane (DME) are bubbled with argon for 5 min and stirred for 7 h at room temperature. We can obtain liquid NaK alloy dispersed in a blue solution. MoS<sub>2</sub> powder (1.2 g) is added to this blue solution and the mixture is further stirred for 24-48 h. A dark dispersion of intercalated MoS<sub>2</sub> was made. After reaction, the product was centrifuged at 8000 rpm for 30 min to remove the DME. The procedures are similar for the NaLi alloy and other single metals (Li, Na, K). Intercalation process for WS<sub>2</sub> is similar except that 1.5 g of WS<sub>2</sub> is used with the same amount of reagent above. Distilled water (200 ml) is added to the intercalated sample to form a homogeneous suspension that was put through dialysis for several days to remove any remaining alkali metal species. The resulting homogeneous dispersion was tested to be stable for several months.

### *Characterization:*

AFM measurements were performed with a SPI 4000 system in tapping mode. The samples of water suspension were deposited on a SiO<sub>2</sub>/Si substrate by spin-coating, dried by evaporation, and the measurements performed in air at ambient temperature and pressure. TEM images were obtained using a JEM-1200EX. The TEM samples were prepared by drying a droplet of the graphene suspension on holey carbon grids. SEM imaging was performed using a JSM 7401F. The SEM samples were prepared by depositing materials onto a silicon substrate by drop-drying. Raman spectroscopy was performed on a Renishaw RM2000 microscopic confocal Raman spectrometer (Gloucestershire, United Kingdom) using green (514 nm) laser excitation. Scans were taken on an extended range (1,000–3,500 cm<sup>-1</sup>). A sample was sonicated in ethanol and drops applied to a glass slide for observation. Raman spectra of solid samples were taken by depositing the graphite on a glass slide. X-ray diffraction data were collected on a Bruker D8-Advance using Cu-K $\alpha$  radiation ( $\lambda=1.5418$  Å).

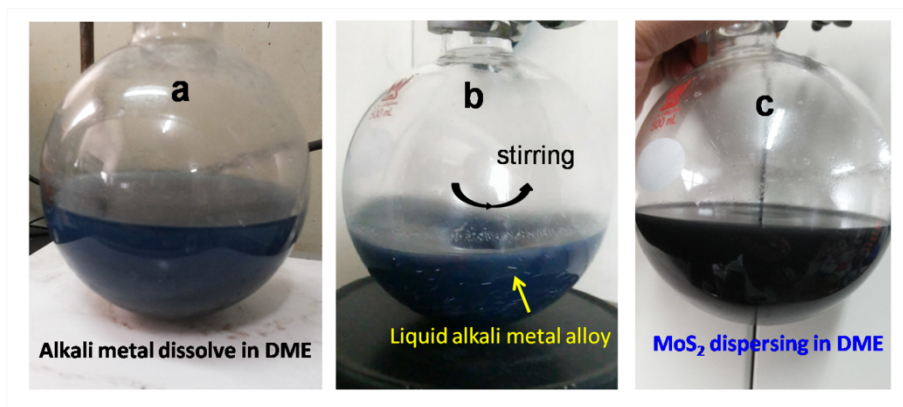

**Figure S1** Alkali metal mixture was dissolved in DME to obtain a blue solution (a) and liquid alkali metal alloy (b). MoS<sub>2</sub> was then dispersed in DME to obtain a dark solution (c).

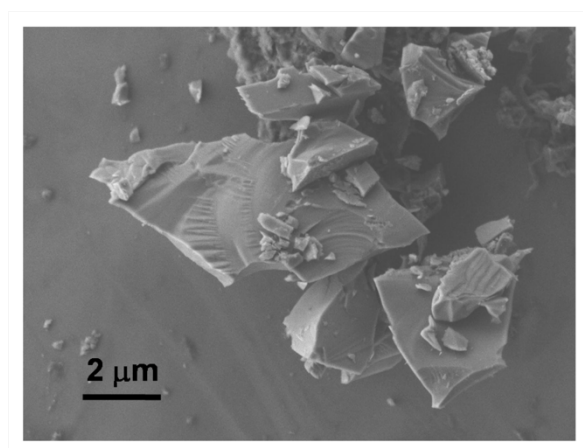

**Figure S2** SEM images of bulk MoS<sub>2</sub>.

S2. Dispersion of the BN and UV-vis spectra of MoS<sub>2</sub>, WS<sub>2</sub> and BN

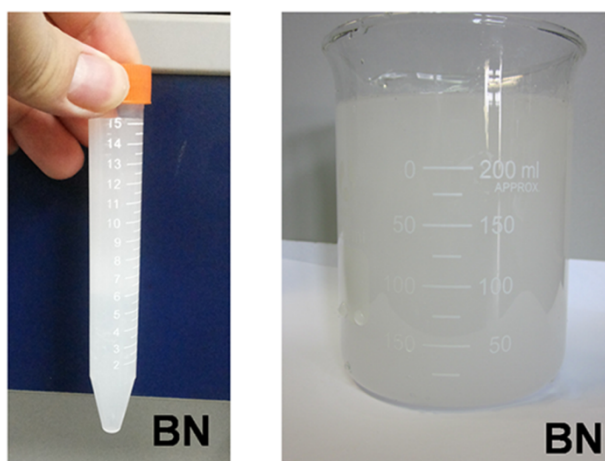

**Figure S3** photo images of dispersions of the NaK-exfoliated BN in water.

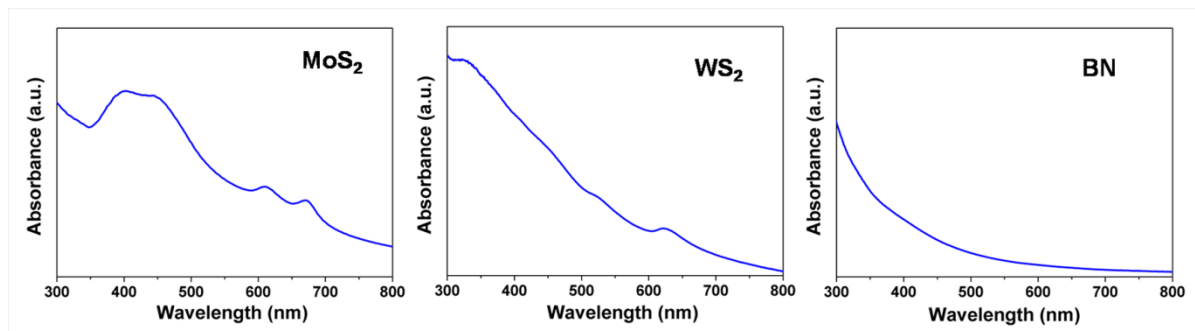

**Figure S4** UV-vis spectra of MoS<sub>2</sub>, WS<sub>2</sub> and BN dispersions in water.

### S3. TEM and EDS of MoS<sub>2</sub> nanosheets

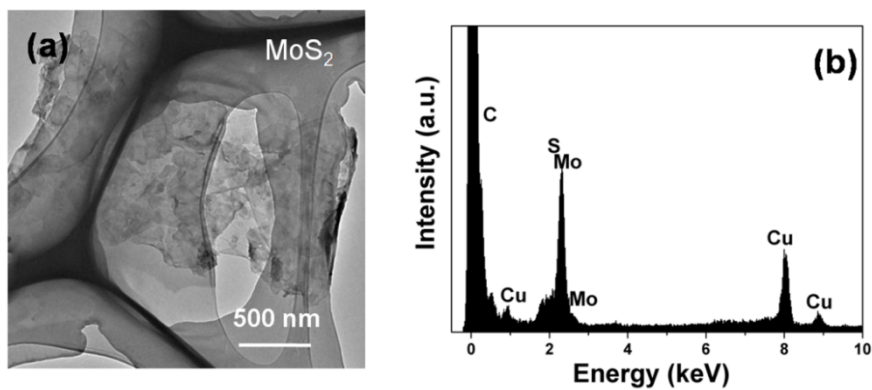

**Figure S5** TEM (a) and the EDS spectrum (b) of MoS<sub>2</sub> nanosheets. Elemental analysis of exfoliated MoS<sub>2</sub> sample using the EDS spectrum of showing the presence of Mo and S.

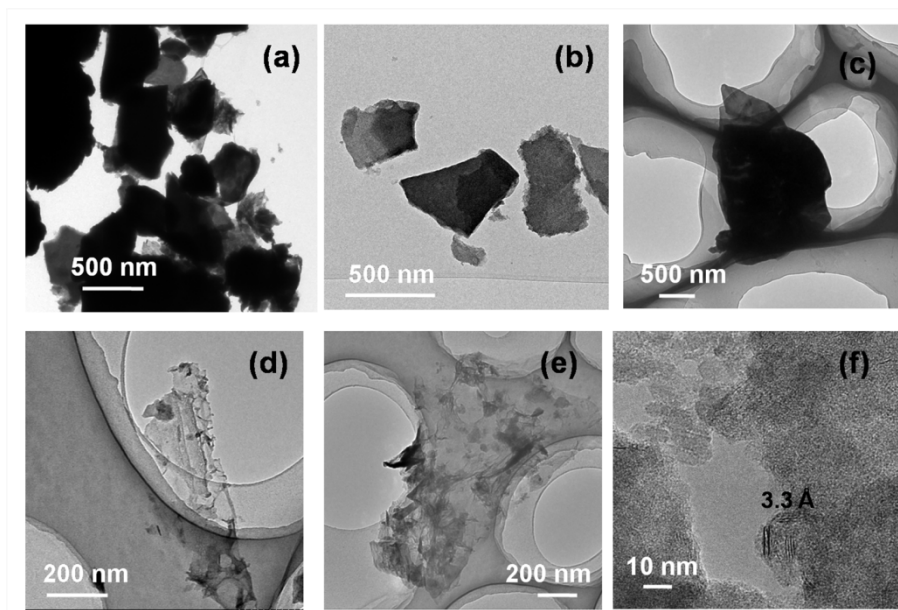

**Figure S6** TEM images of MoS<sub>2</sub> nanosheets exfoliated by single alkali metal Li (a), Na (b), K (c), and alkali metal alloy NaLi (d) and NaK (e), and HTEM image of MoS<sub>2</sub> exfoliated by NaK (f) .

#### S4. XRD of MoS<sub>2</sub> before and after exfoliation

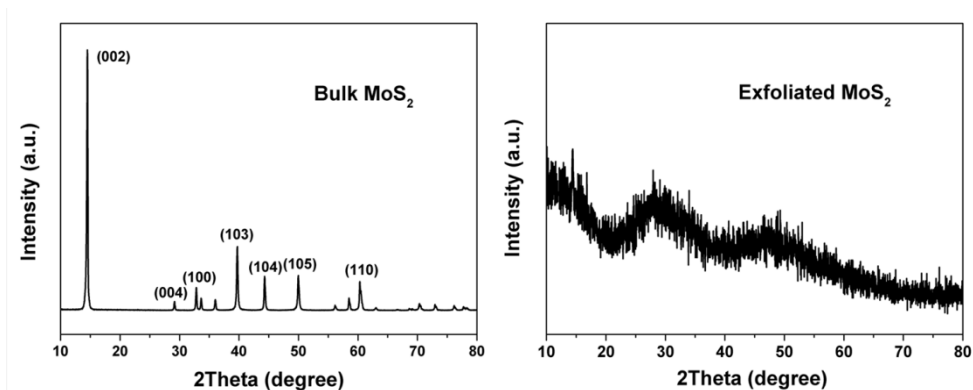

**Figure S7** XRD of MoS<sub>2</sub> before and after exfoliation.

#### S5. MoS<sub>2</sub> and WS<sub>2</sub> film fabrication and EDS and Raman Characterization

##### (1) Fabrication of MoS<sub>2</sub> thin films on PET substrate and WS<sub>2</sub> film on PVDF film

A dilute MoS<sub>2</sub> suspension was vacuum filtered using a mixed cellulose ester membrane with 20 nm pores (Millipore). The MoS<sub>2</sub> film was allowed to dry and adhered to the substrate at room temperature overnight under a 5.0 kg weight. The

weight was removed and the membrane dissolved in acetone to leave the GO thin film on the substrate. The MoS<sub>2</sub> film was then carefully transferred onto a PET film. A dilute WS<sub>2</sub> suspension was vacuum filtered using a PVDF membrane with 20 nm pores (Millipore). Subsequently, the WS<sub>2</sub>/PVDF film was dried at room temperature.

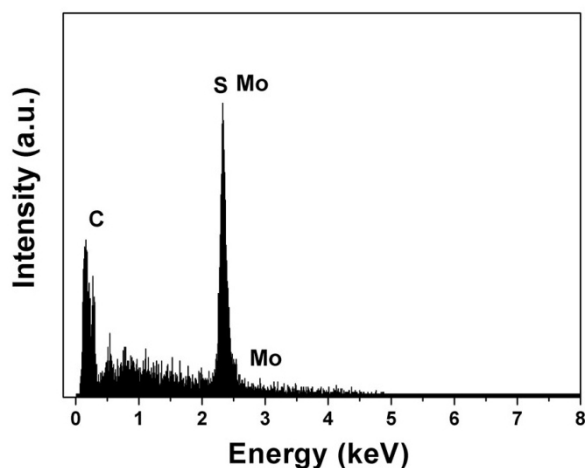

**Figure S8** EDS spectra of the MoS<sub>2</sub> thin films on PET substrate. Elemental analysis of exfoliated MoS<sub>2</sub> sample using the EDS spectrum of showing the presence of Mo and S.

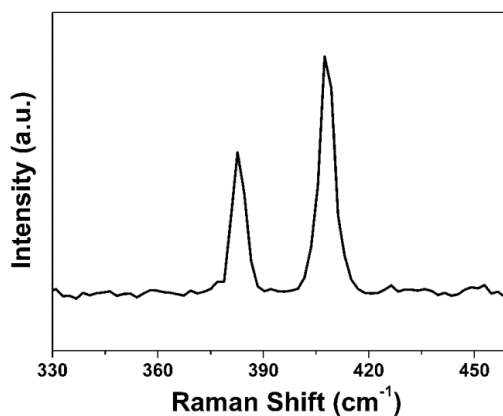

**Figure S9** Raman spectra of the MoS<sub>2</sub> thin films on PET substrate.

S6. Comparison between our method and the previous liquid-phase exfoliation methods

Table S1. Comparison between our method and the previous liquid-phase exfoliation methods

| ref                                                                                | method                                                                                                 | Cost and time                                    | Single-layer yield | flake size | toxicity                                  | recycle                             | crystallinity |
|------------------------------------------------------------------------------------|--------------------------------------------------------------------------------------------------------|--------------------------------------------------|--------------------|------------|-------------------------------------------|-------------------------------------|---------------|
| <i>Nano Lett.</i> 2011, <b>11</b> , 5111;<br><i>ACS Nano</i> 2012, <b>6</b> , 7311 | Ion intercalation using n-butyllithium, air-free; elevated reaction temperature (100 °C)               | Expensive reagent; time consuming                | low                | Small,     | High                                      | hard                                | poor          |
| <i>Nat. Commun.</i> 2014, <b>5</b> , 2995                                          | Ion intercalation using sodium naphthalenide; air-free; pre-treated with N <sub>2</sub> H <sub>4</sub> | two steps, time consuming                        | high               | large      | using toxic N <sub>2</sub> H <sub>4</sub> | Naphthalenide is hard to recycle    | high          |
| <i>Science</i> 2011, 331, 568; <i>Adv. Mater.</i> 2011, 23, 3944                   | Ultrasonication in solvents or aqueous surfactant solutions                                            | Expensive organic solvents, long time sonication | low                | small      | low                                       | Organic solvents is hard to recycle | high          |
| <i>Angew. Chem., Int. Ed.</i> 2011, 50, 10839                                      | Mixed-solvent strategy for liquid exfoliation                                                          | Low cost, long time sonication                   | low                | small      | low                                       | easy                                | high          |
| <b>Our method</b>                                                                  | Directly exfoliation using liquid alkali metal alloys at room temperature; without pre-treated         | Low cost, one step                               | high               | large      | low                                       | easy                                | high          |
